# Supplementary material for: Global cotton production under climate change – Implications for yield and water consumption
Source: Copernicus journal article supplement (doi:10.5194/hess-2019-595), 2020-01-16
Supplement: Supplementary file 1 [file hess-2019-595-supplement.pdf]

## *Supplement to:*

# **Global cotton production under climate change - Implications for yield and water consumption**

Yvonne Jans<sup>1,2</sup>, Werner von Bloh<sup>1</sup>, Sibyll Schaphoff<sup>1</sup>, and Christoph Müller<sup>1</sup>

<sup>1</sup>Potsdam Institute for Climate Impact Research, Member of the Leibniz Association, P.O. Box 60 12 03, DE-14412 Potsdam, Germany

<sup>2</sup>Humboldt-Universität zu Berlin, Department of Geography, Unter den Linden 6, DE-10099 Berlin, Germany

**Correspondence:** Yvonne Jans (jans@pik-potsdam.de)

## **S1 Introduction - economic background**

**Table S1.** The top ten cotton producing countries (Sheth, 2017) and their cotton export values in 2017 (including raw cotton, cotton yarn, thread and woven fabrics) (ITC, 2019)

| Country       | Cotton export value [billion US\$] |
|---------------|------------------------------------|
| China         | 15.1                               |
| United States | 7.6                                |
| India         | 6.9                                |
| Pakistan      | 3.5                                |
| Turkey        | 1.7                                |
| Australia     | 1.6                                |
| Brazil        | 1.5                                |
| Uzbekistan    | 0.9                                |
| Turkmenistan  | 0.4                                |
| Mexico        | 0.25                               |
| Total         | 39.45                              |

## S2 Parameterisation of cotton

### S2.1 Planting density

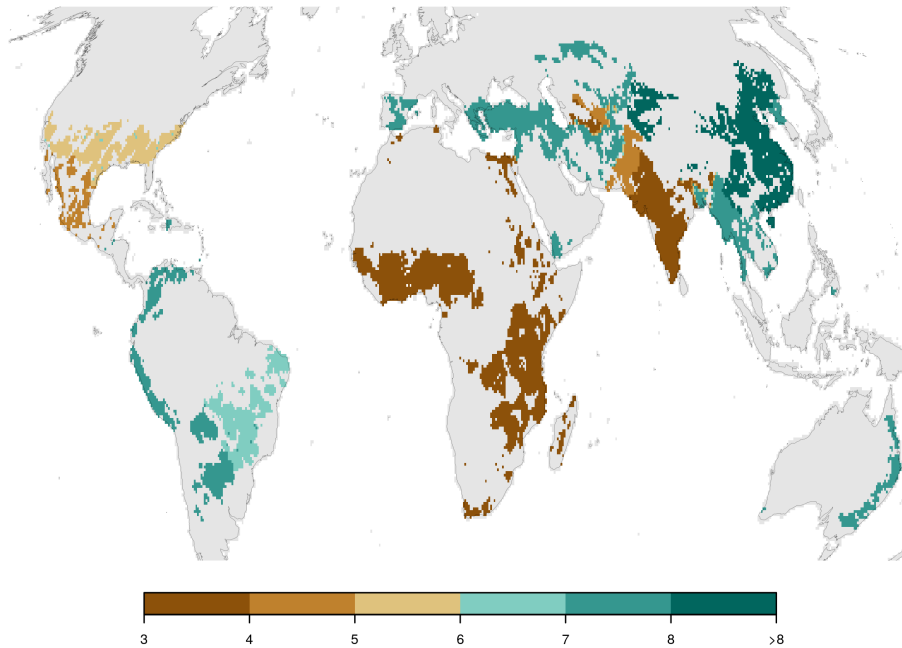

**Figure S1.** Country-specific cotton planting densities [ $\text{plants } m^{-2}$ ] used in this study. Gray indicates areas currently not used for cotton production (Portmann et al., 2010).

## S2.2 Total cotton area and irrigated crop land fraction

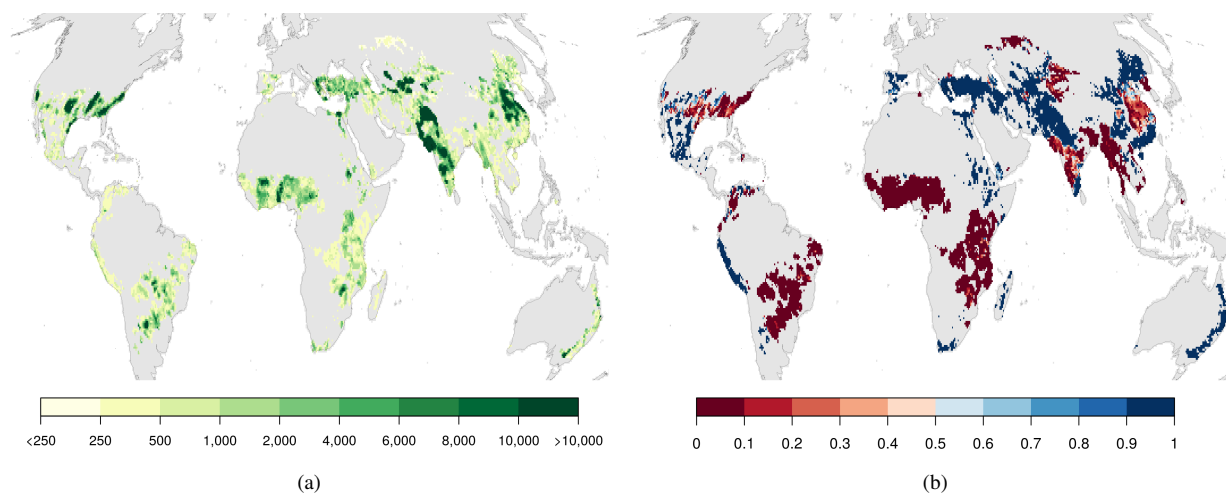

**Figure S2.** (a) Spatial distribution of cotton area [ $\text{ha grid cell}^{-1}$ ] and (b) the share of irrigated area in total cotton area around the year 2000 as provided by Portmann et al. (2010). Gray indicates areas currently not used for cotton production.

## 5 S2.3 Sowing days and growing season

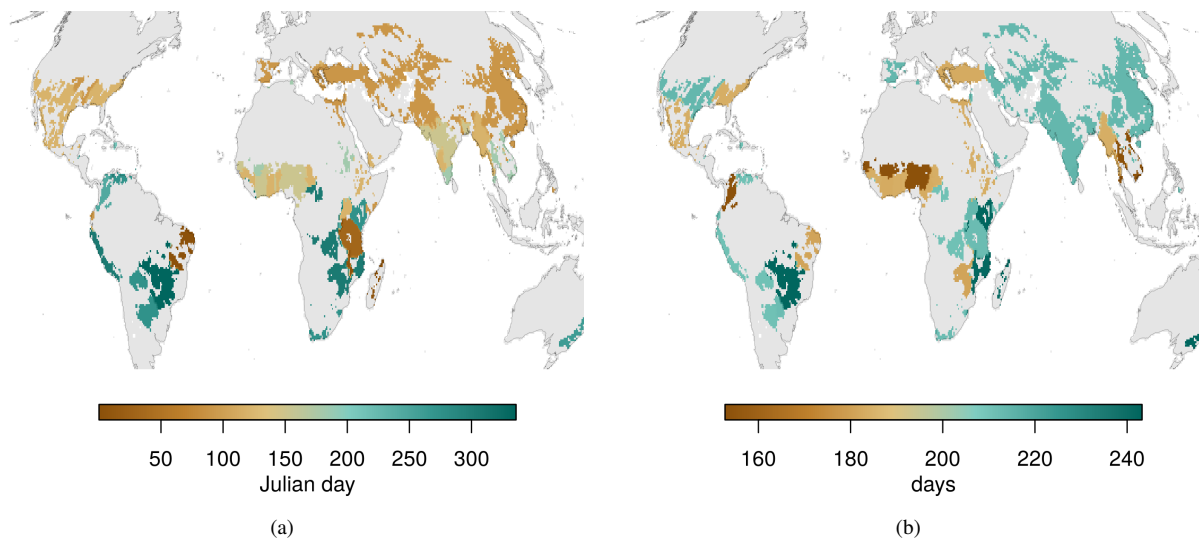

**Figure S3.** (a) Sowing dates and (b) length of the growing period used to simulate cotton yields. See section "Modeling protocol and input data" (main text) for further description. Gray indicates areas currently not used for cotton production (Portmann et al., 2010).

## S3 Results

### S3.1 Evaluation of model performance

#### S3.1.1 National level

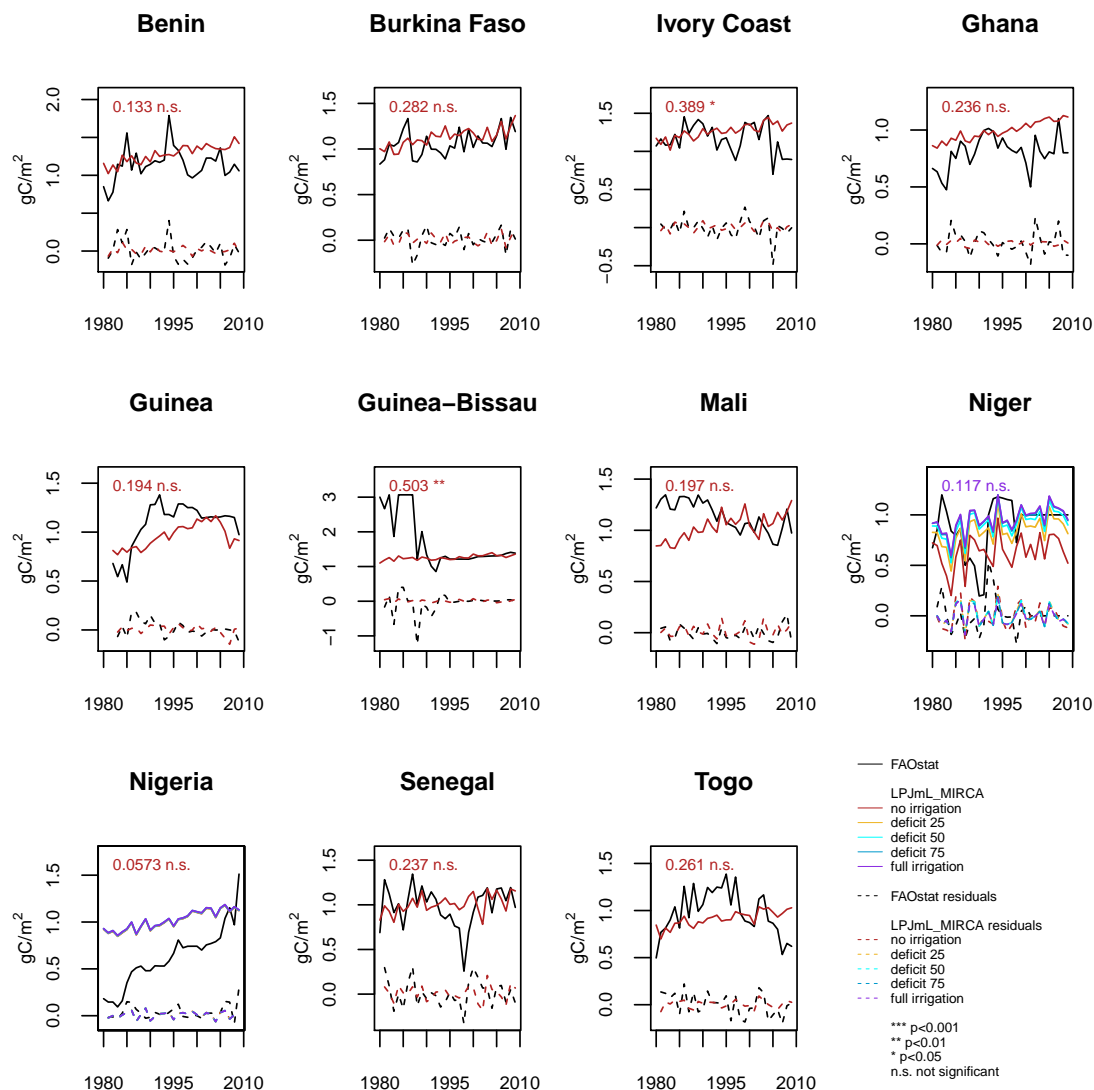

**Figure S4.** Comparing interannual yield variability West African countries. Numbers in each plot depict the correlation coefficient between simulated residuals and FAOstat residuals. The colour of the correlation coefficient indicates to best fitting irrigation option. The different irrigation options (on irrigated cropland only) are shown in coloured lines.

**Table S2:** Correlation test (Pearson method) between observed and simulated cotton yields for all cotton producing countries. Countries with missing data on either cotton area (Portmann et al., 2010) or cotton yield observations (FAO et al., 2018) were excluded.

Significance: \*\*\* p<0.001, \*\* p<0.01, \* p<0.05, n.s. not significant

| Country                  | Correlation | Irrigation level | MBE [t ha <sup>-1</sup> ] | Irrigation level | Plant density |
|--------------------------|-------------|------------------|---------------------------|------------------|---------------|
| Afghanistan              | 0.180 n.s.  | deficit 25       | 0.896                     | deficit 25       | -1            |
| Albania                  | 0.121 n.s.  | no irrigation    | 0.239                     | no irrigation    | -1            |
| Angola                   | 0.0818 n.s. | no irrigation    | 1.843                     | no irrigation    | -1            |
| Argentina                | 0.169 n.s.  | no irrigation    | 0.669                     | no irrigation    | -1            |
| Australia                | 0.383 *     | full irrigation  | -0.255                    | deficit 75       | 7.5           |
| Azerbaijan               | 0.425 n.s.  | deficit 50       | 0.848                     | deficit 25       | -1            |
| Bangladesh               | 0.170 n.s.  | no irrigation    | -0.748                    | no irrigation    | -1            |
| Benin                    | 0.133 n.s.  | no irrigation    | 0.244                     | no irrigation    | 4             |
| Bolivia                  | 0.216 n.s.  | no irrigation    | 1.751                     | no irrigation    | -1            |
| Brazil                   | 0.203 n.s.  | deficit 25       | -0.362                    | no irrigation    | 7             |
| Bulgaria                 | 0.498 **    | no irrigation    | -0.481                    | no irrigation    | -1            |
| Burkina Faso             | 0.282 n.s.  | no irrigation    | 0.056                     | no irrigation    | 4             |
| Burundi                  | 0.249 n.s.  | no irrigation    | 0.086                     | no irrigation    | -1            |
| Cambodia                 | 0.218 n.s.  | no irrigation    | 1.521                     | no irrigation    | -1            |
| Cameroon                 | 0.246 n.s.  | no irrigation    | 0.212                     | no irrigation    | 4             |
| Central African Republic | 0.150 n.s.  | no irrigation    | -0.090                    | no irrigation    | 4             |
| Chad                     | 0.168 n.s.  | no irrigation    | 0.725                     | no irrigation    | 4             |
| China                    | 0.176 n.s.  | full irrigation  | -0.135                    | deficit 25       | 11            |
| Colombia                 | 0.339 n.s.  | no irrigation    | -0.298                    | full irrigation  | -1            |
| Côte d'Ivoire            | 0.389 *     | no irrigation    | 0.254                     | no irrigation    | 4             |
| DR Congo                 | 0.0651 n.s. | no irrigation    | 1.255                     | no irrigation    | 4             |
| Ecuador                  | 0.299 n.s.  | full irrigation  | 0.311                     | deficit 25       | -1            |
| Egypt                    | 0.349 n.s.  | deficit 50       | -0.121                    | deficit 50       | -1            |
| Ethiopia                 | 0.153 n.s.  | deficit 25       | 1.522                     | deficit 25       | -1            |

**Table S2:** Correlation test (Pearson method) between observed and simulated cotton yields for all cotton producing countries. Significance: \*\*\* p<0.001, \*\* p<0.01, \* p<0.05, n.s. not significant (*continued*)

| Country       | Correlation | Irrigation level | MBE [t<br>ha <sup>-1</sup> ] | Irrigation level | Plant<br>density |
|---------------|-------------|------------------|------------------------------|------------------|------------------|
| Ghana         | 0.236 n.s.  | no irrigation    | 0.244                        | no irrigation    | 3                |
| Greece        | 0.272 n.s.  | deficit 25       | 0.047                        | deficit 50       | -1               |
| Guatemala     | 0.362 n.s.  | no irrigation    | 1.119                        | no irrigation    | -1               |
| Guinea        | 0.192 n.s.  | no irrigation    | -0.018                       | no irrigation    | 3                |
| Guinea-Bissau | 0.503 **    | no irrigation    | 0.009                        | no irrigation    | 4                |
| Haiti         | 0.219 n.s.  | no irrigation    | 1.700                        | no irrigation    | -1               |
| Honduras      | 0.381 *     | full irrigation  | 1.208                        | deficit 25       | -1               |
| India         | 0.424 *     | no irrigation    | 0.022                        | deficit 50       | 3.5              |
| Iran          | 0.181 n.s.  | deficit 75       | 0.092                        | deficit 25       | -1               |
| Iraq          | 0.345 n.s.  | full irrigation  | 0.091                        | deficit 25       | -1               |
| Israel        | 0.311 n.s.  | full irrigation  | -0.119                       | full irrigation  | -1               |
| Kazakhstan    | 0.535 *     | full irrigation  | 0.035                        | deficit 25       | -1               |
| Kenya         | 0.284 n.s.  | full irrigation  | 1.092                        | no irrigation    | -1               |
| Kyrgyzstan    | 0.322 n.s.  | deficit 25       | 0.010                        | deficit 75       | -1               |
| Laos          | 0.238 n.s.  | deficit 25       | 0.229                        | deficit 25       | -1               |
| Macedonia     | 0.567 *     | deficit 50       | 0.796                        | deficit 25       | -1               |
| Madagascar    | 0.374 *     | full irrigation  | 2.956                        | deficit 25       | -1               |
| Malawi        | 0.524 **    | no irrigation    | -0.609                       | no irrigation    | -1               |
| Mali          | 0.197 n.s.  | no irrigation    | 0.053                        | no irrigation    | 4                |
| Mexico        | 0.227 n.s.  | deficit 25       | -1.140                       | full irrigation  | 5                |
| Morocco       | 0.283 n.s.  | deficit 25       | -0.153                       | deficit 25       | -1               |
| Mozambique    | 0.0011 n.s. | no irrigation    | 2.550                        | no irrigation    | -1               |
| Myanmar       | 0.101 n.s.  | no irrigation    | 1.011                        | no irrigation    | -1               |
| Namibia       | 0.413 n.s.  | deficit 75       | 1.243                        | deficit 25       | -1               |
| Nepal         | 0.239 n.s.  | no irrigation    | 1.610                        | no irrigation    | -1               |
| Niger         | 0.117 n.s.  | full irrigation  | -0.016                       | deficit 75       | 5                |
| Nigeria       | 0.0608 n.s. | no irrigation    | 0.276                        | deficit 25       | 4                |

**Table S2:** Correlation test (Pearson method) between observed and simulated cotton yields for all cotton producing countries. Significance: \*\*\* p<0.001, \*\* p<0.01, \* p<0.05, n.s. not significant (*continued*)

| Country       | Correlation  | Irrigation level | MBE [t<br>ha <sup>-1</sup> ] | Irrigation level | Plant<br>density |
|---------------|--------------|------------------|------------------------------|------------------|------------------|
| North Korea   | 0.117 n.s.   | deficit 25       | 0.670                        | deficit 25       | -1               |
| Pakistan      | 0.255 n.s.   | full irrigation  | -0.054                       | full irrigation  | 4.5              |
| Paraguay      | 0.207 n.s.   | no irrigation    | 2.253                        | no irrigation    | -1               |
| Peru          | 0.392 *      | deficit 75       | -0.045                       | deficit 50       | -1               |
| Philippines   | 0.222 n.s.   | no irrigation    | 2.286                        | no irrigation    | -1               |
| Senegal       | 0.237 n.s.   | no irrigation    | -0.016                       | no irrigation    | 4                |
| Somalia       | 0.194 n.s.   | deficit 75       | -0.404                       | no irrigation    | -1               |
| South Africa  | 0.312 n.s.   | deficit 25       | 0.176                        | deficit 25       | -1               |
| South Korea   | 0.0296 n.s.  | no irrigation    | 2.048                        | no irrigation    | -1               |
| Spain         | 0.300 n.s.   | full irrigation  | 0.259                        | deficit 50       | -1               |
| Sudan         | 0.0659 n.s.  | deficit 25       | 0.109                        | deficit 25       | -1               |
| Swaziland     | 0.523 **     | no irrigation    | -0.538                       | no irrigation    | -1               |
| Syria         | 0.440 *      | full irrigation  | -0.155                       | full irrigation  | -1               |
| Tajikistan    | 0.300 n.s.   | deficit 25       | 0.537                        | deficit 25       | -1               |
| Tanzania      | 0.00818 n.s. | no irrigation    | 1.062                        | no irrigation    | -1               |
| Thailand      | 0.160 n.s.   | no irrigation    | 0.409                        | no irrigation    | -1               |
| Togo          | 0.267 n.s.   | no irrigation    | 0.169                        | no irrigation    | 3                |
| Tunisia       | 0.00229 n.s. | no irrigation    | -0.433                       | no irrigation    | -1               |
| Turkey        | 0.274 n.s.   | deficit 25       | -0.361                       | full irrigation  | 8                |
| Turkmenistan  | 0.353 n.s.   | deficit 25       | 0.183                        | deficit 50       | 4                |
| Uganda        | 0.0159 n.s.  | no irrigation    | 2.643                        | no irrigation    | -1               |
| United States | 0.494 **     | deficit 75       | 0.075                        | deficit 75       | 6                |
| Uzbekistan    | 0.403 *      | deficit 50       | 0.033                        | deficit 75       | 4.5              |
| Venezuela     | 0.401 *      | no irrigation    | -0.659                       | no irrigation    | -1               |
| Vietnam       | 0.198 n.s.   | no irrigation    | 0.484                        | no irrigation    | -1               |
| Yemen         | 0.221 n.s.   | deficit 25       | 0.706                        | deficit 25       | -1               |
| Zambia        | 0.381 *      | no irrigation    | 1.480                        | no irrigation    | -1               |

**Table S2:** Correlation test (Pearson method) between observed and simulated cotton yields for all cotton producing countries. Significance: \*\*\*  $p < 0.001$ , \*\*  $p < 0.01$ , \*  $p < 0.05$ , n.s. not significant (*continued*)

| Country  | Correlation | Irrigation level | MBE [t $ha^{-1}$ ] | Irrigation level | Plant density |
|----------|-------------|------------------|--------------------|------------------|---------------|
| Zimbabwe | 0.622 ***   | full irrigation  | 1.664              | no irrigation    | -1            |

### S3.1.2 Grid cell level

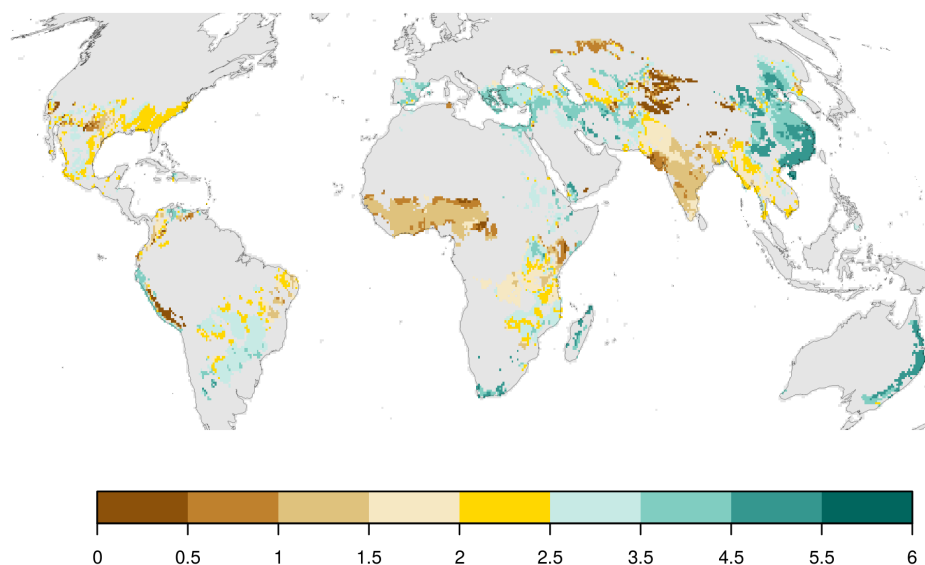

**Figure S5.** Simulated seedcotton yield [ $t ha^{-1}$ ] on cotton production areas around the year 2000 as provided by Portmann et al. (2010). Gray indicates areas currently not used for cotton production. Yields were averaged over 1996-2005.



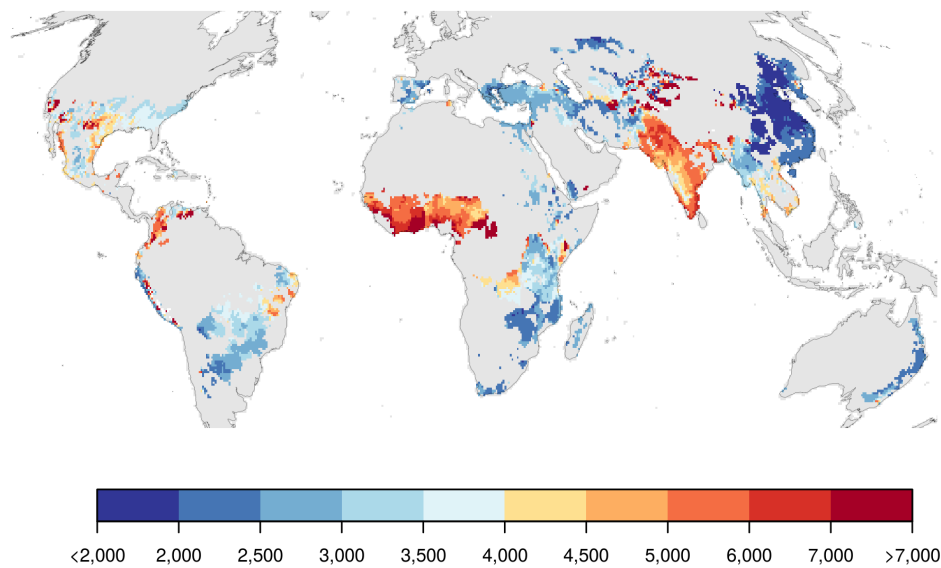

**Figure S6.** Simulated virtual water content of seed cotton yield [ $m^3 t^{-1}$ ] according to the spatial pattern around the year 2000 as provided by Portmann et al. (2010). Gray indicates areas currently not used for cotton production. Results were averaged over 1997-2001 for comparison with values in (Chapagain et al., 2006).

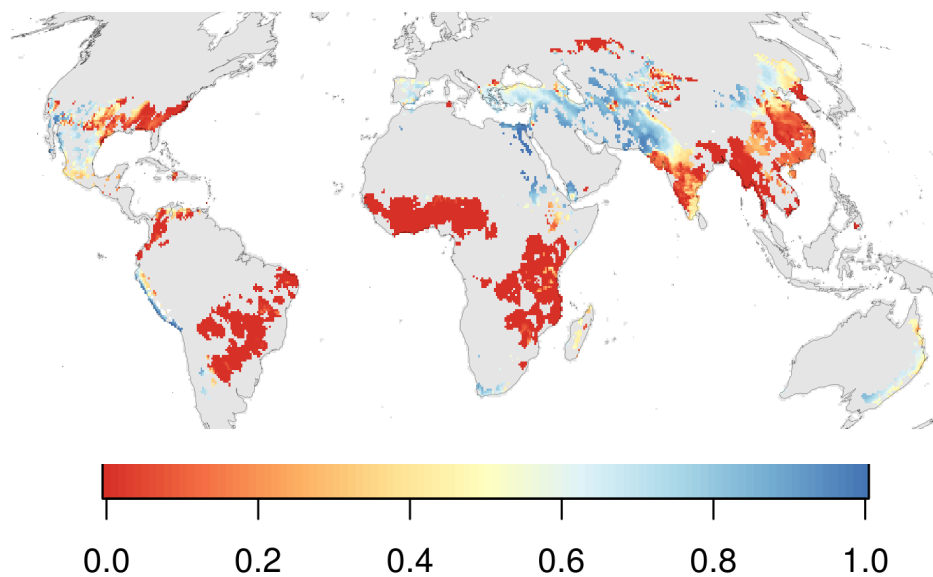

**Figure S7.** Ratio of blue water to virtual water content of cotton production according to the spatial pattern of irrigated cotton area shares as provided by Portmann et al. (2010). Gray indicates areas currently not used for cotton production.

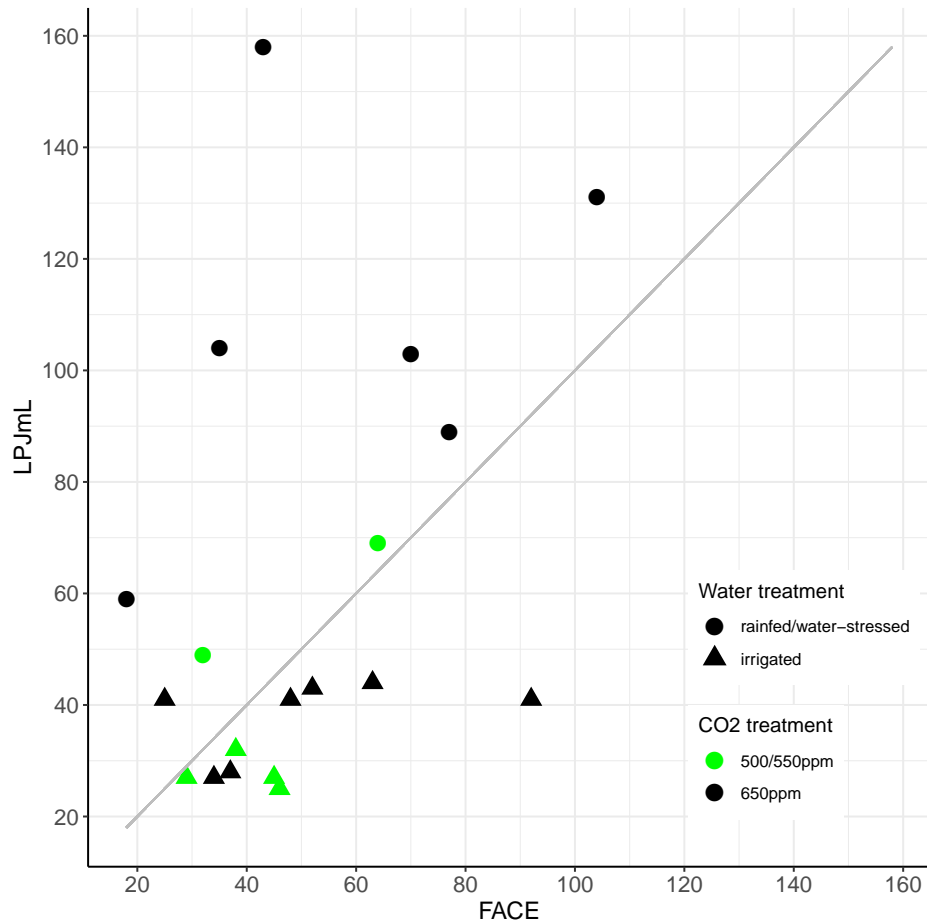

**Figure S8.** Relative increase in cotton yields according to increasing atmospheric CO<sub>2</sub> and different levels of water stress. Between 1983 and 1987 OTC technology was used to expose cotton crops to 650 μmol mol<sup>-1</sup> CO<sub>2</sub> and results were compared to an ambient CO<sub>2</sub> concentration of 350 μmol mol<sup>-1</sup> Kimball et al. (1992). In 1990 and 1991, FACE treatment increased atmospheric CO<sub>2</sub> levels starting from 353 μmol mol<sup>-1</sup> (Kimball, 2016) and 370 μmol mol<sup>-1</sup> (Mauney et al., 1994) to 550 μmol mol<sup>-1</sup>, respectively. Simulated values (LPJmL) represent cotton yields under purely rainfed conditions and the absence of water stress, respectively. In order to reproduce some of the experimental conditions, simulation parameters such as sowing day, growing period, atmospheric CO<sub>2</sub> concentration and plantation density were adapted to the values provided by Kimball et al. (1992), Lewin et al. (1994) and Nagy et al. (1994). Yield data were taken from Kimball et al. (1992) for OTC yields in the years 1983-1987 and from Mauney et al. (1994) and Kimball (2016) for FACE experiments in the years 1990-1991. OTC experiments were conducted in Phoenix, Arizona (33°4'N 112°0' W) and FACE experiments in Maricopa, Arizona (33°3'N 112°3' W) and simulated results are only given for the corresponding grid cell.

S3.2.1 Climate change and CO<sub>2</sub> fertilisation

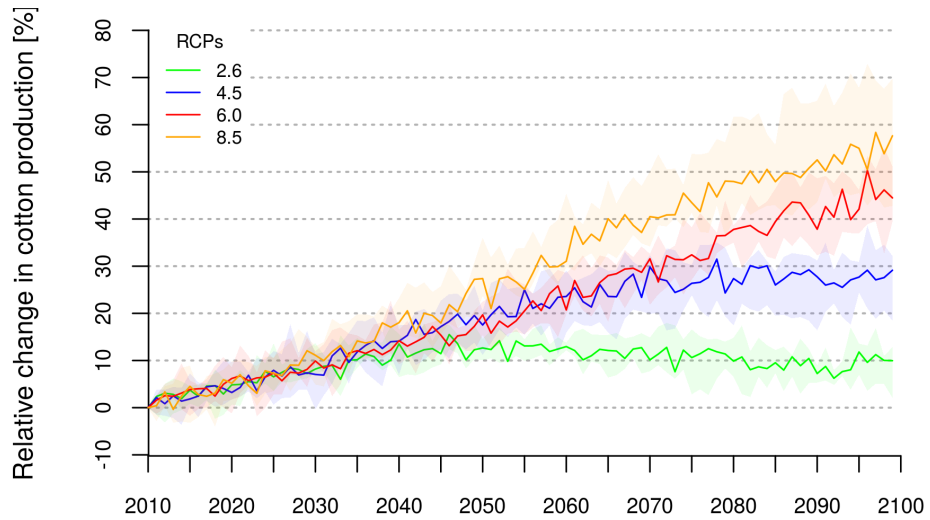

**Figure S9.** Relative change in LPJmL-simulated global seedcotton production [%] for different RCPs. Transparent colours show the uncertainty ranges of 5 different GCM patterns.

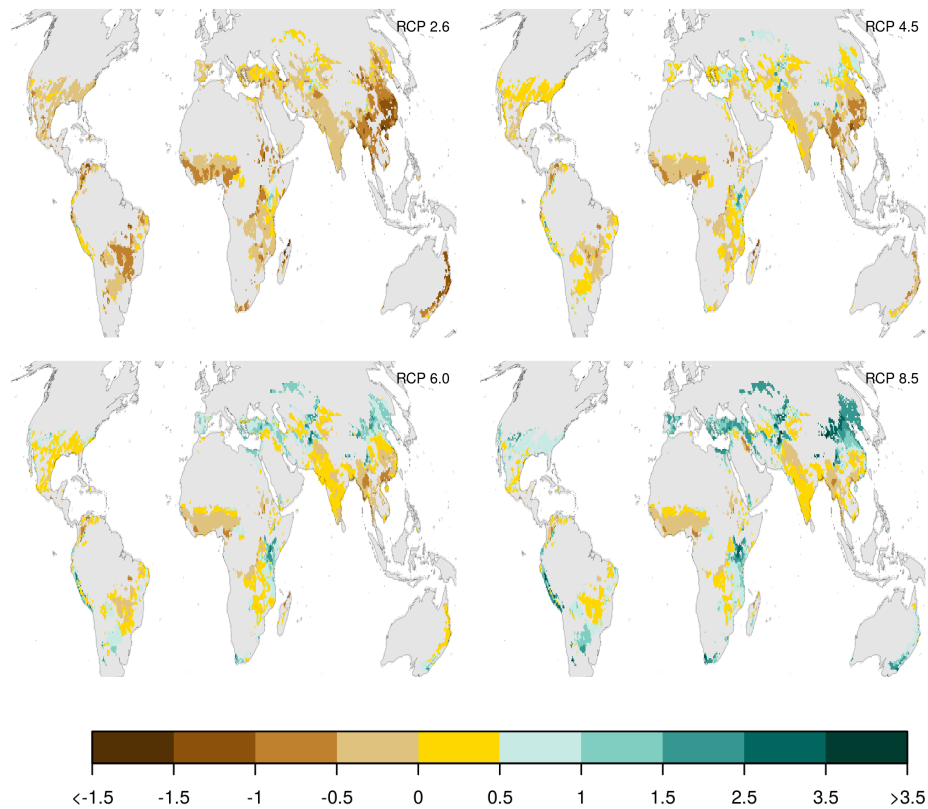

**Figure S10.** Simulated changes in cotton yield [ $t\ ha^{-1}$ ] for different RCPs. Spatial pattern was kept constant to the year 2000 as provided by Portmann et al. (2010). Gray indicates areas currently not used for cotton production. Yields were averaged over 5 climate scenarios per RCP and over the period 2090-2099.

### S3.2.2 Climate change without beneficial CO<sub>2</sub> effect

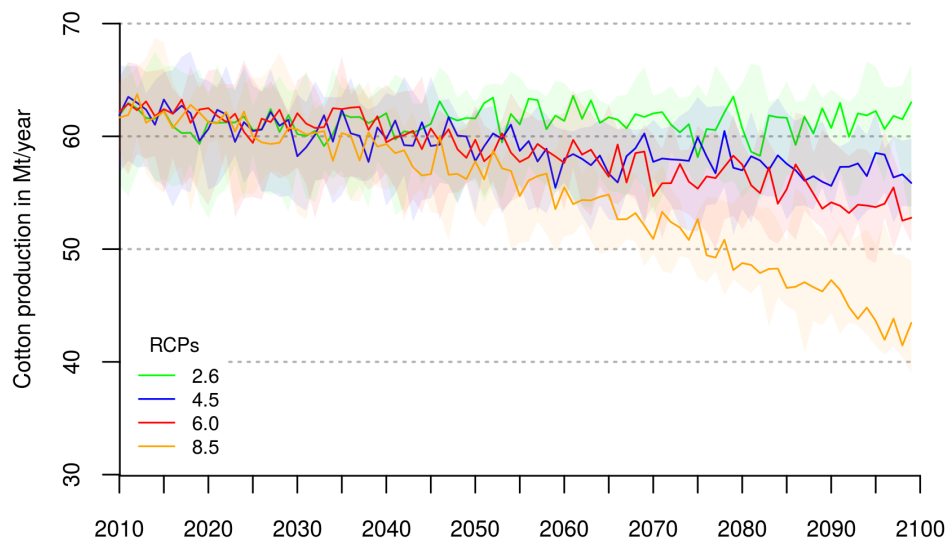

**Figure S11.** Simulated global cotton production [million tonnes] for different RCPs. Transparent colours show the uncertainty ranges of 5 different GCM patterns. After 2000, the [CO<sub>2</sub>] was kept constant at the level of 2000 (368.87 ppm).

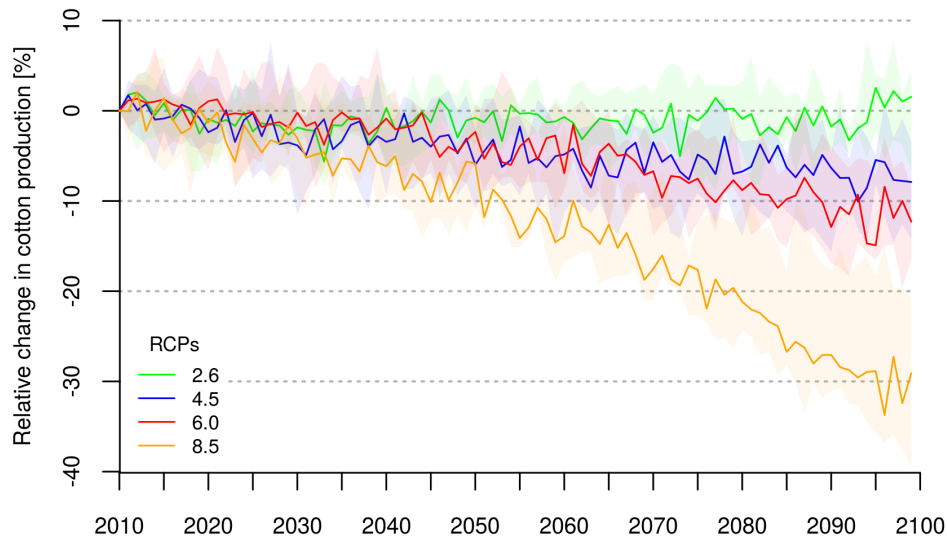

**Figure S12.** Relative change in LPJmL-simulated global cotton production [%] for different RCPs. Transparent colours show the uncertainty ranges of 5 different GCM patterns. After 2000, the [CO<sub>2</sub>] was kept constant at the level of 2000 (368.87 ppm).

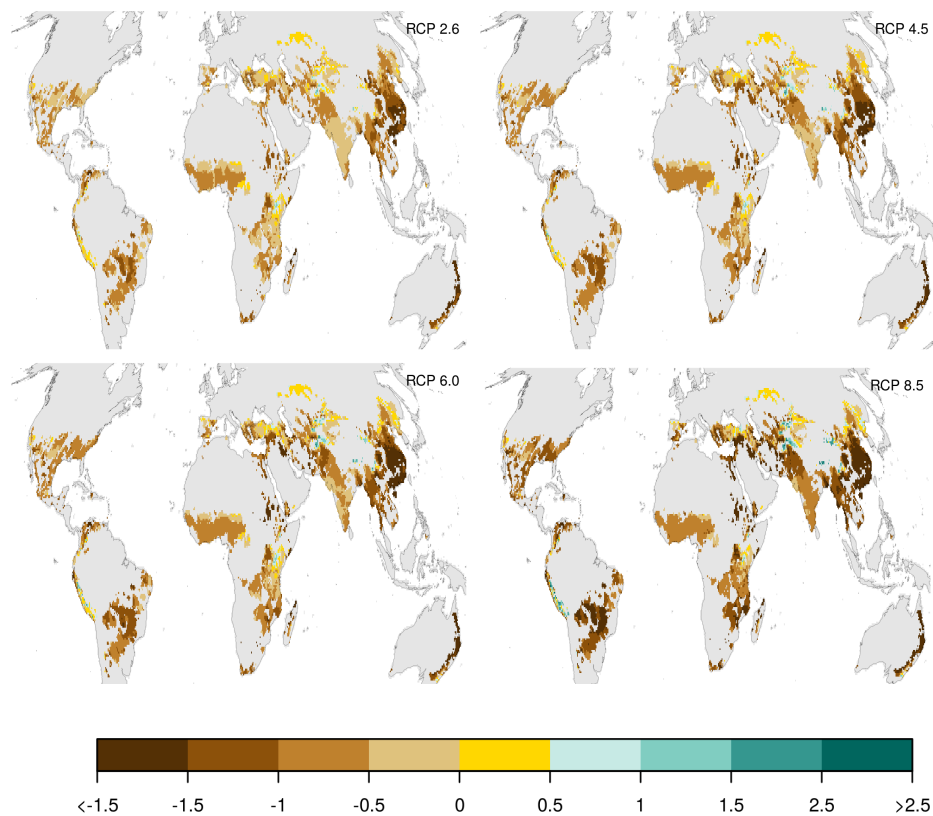

**Figure S13.** Simulated changes in cotton yield [ $t\ ha^{-1}$ ] for different RCPs. The spatial cropland pattern was kept constant to the year 2000 as provided by Portmann et al. (2010). Gray indicates areas currently not used for cotton production. Yields were averaged over 5 climate scenarios per RCP and over the period 2090-2099. After 2000, the  $[CO_2]$  was kept constant at the level of 2000 (368.87 ppm).

### S3.3 Climate change impacts on irrigation water consumption

#### S3.3.1 Climate change and CO<sub>2</sub> fertilisation

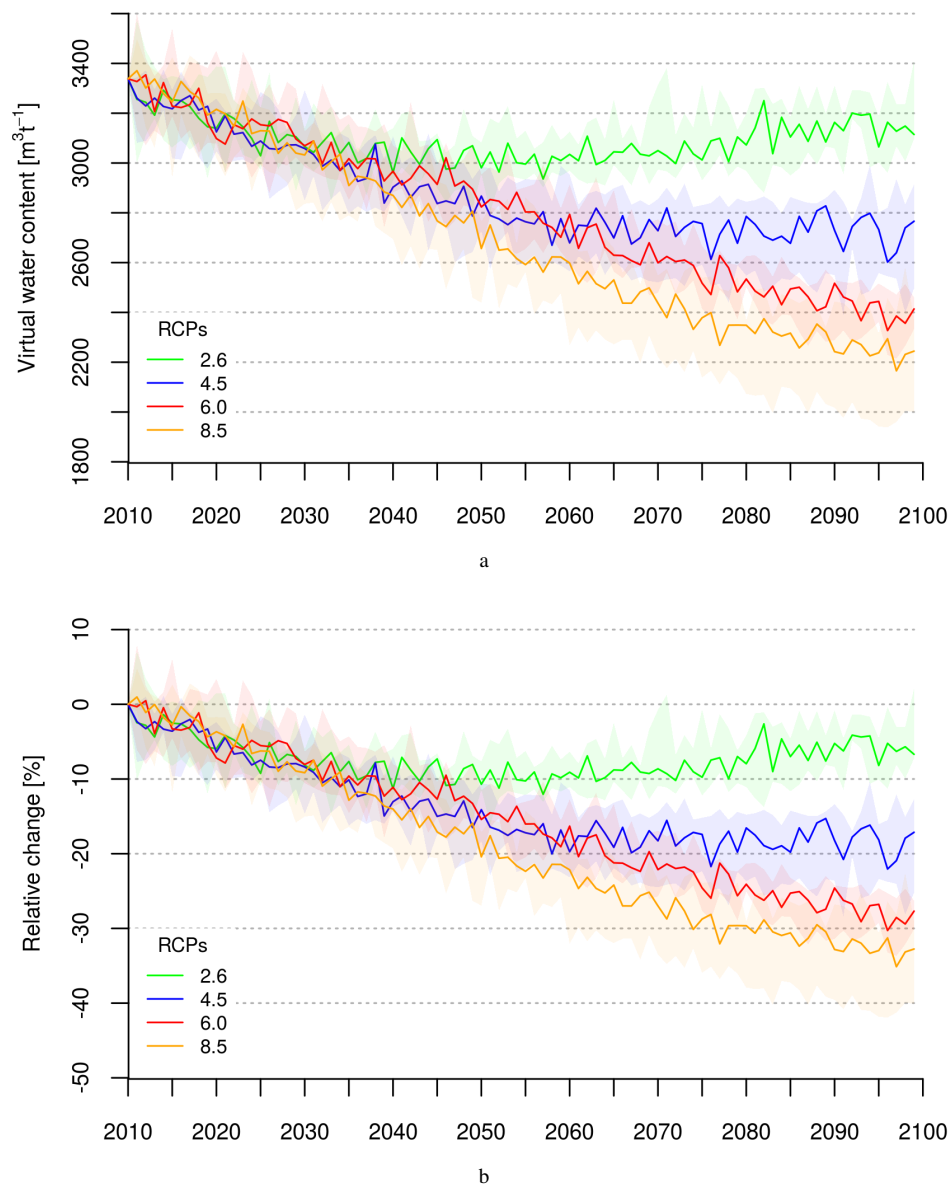

**Figure S14.** (a) Simulated average virtual water content of seed cotton [ $\text{m}^3 \text{t}^{-1}$ ] and (b) its relative change [%] for different RCPs. Transparent colours show the uncertainty ranges of 5 different GCM patterns.

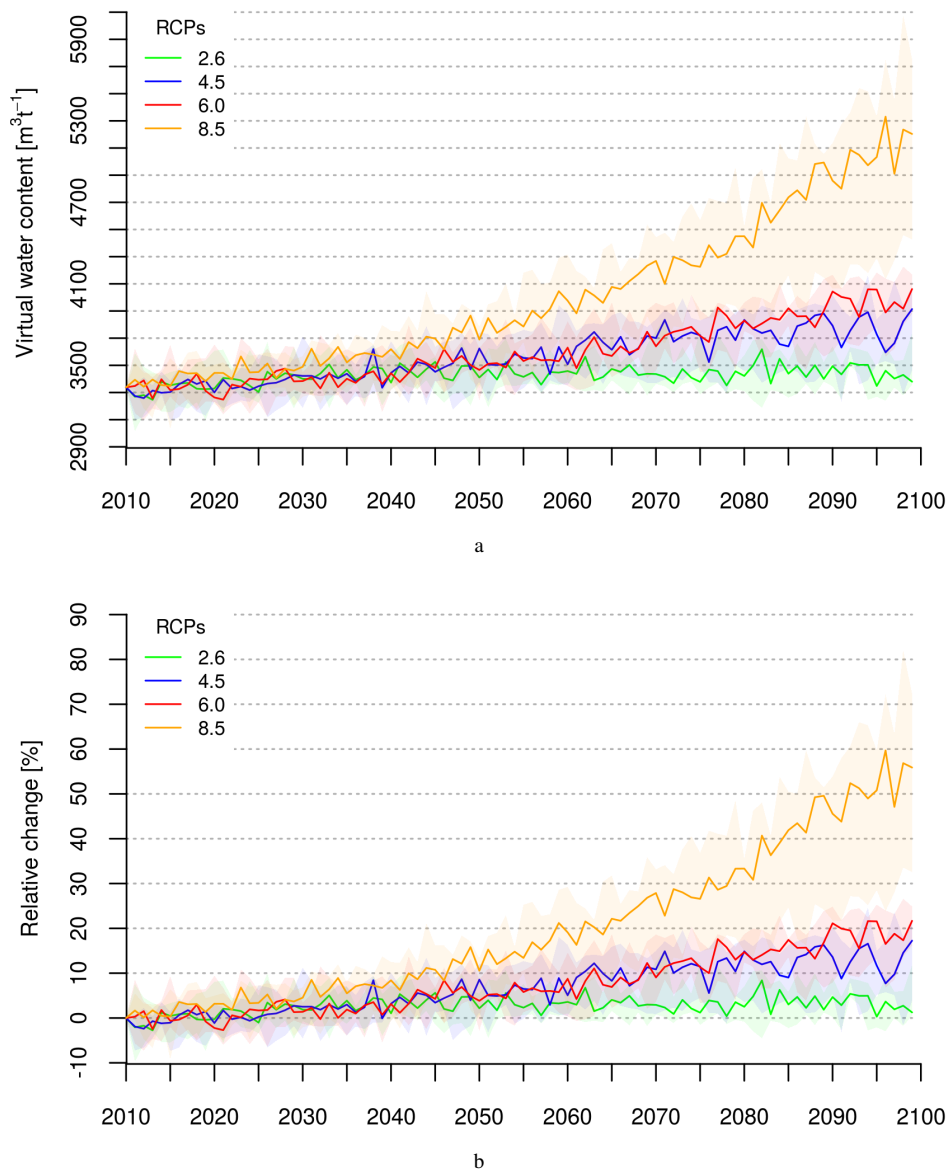

**Figure S15.** (a) Simulated average virtual water content of seed cotton [ $\text{m}^3\text{t}^{-1}$ ] and (b) its relative change [%] for different RCPs. Transparent colours show the uncertainty ranges of 5 different GCM patterns. After 2000, the  $[\text{CO}_2]$  was kept constant at the level of 2000 (368.87 ppm).



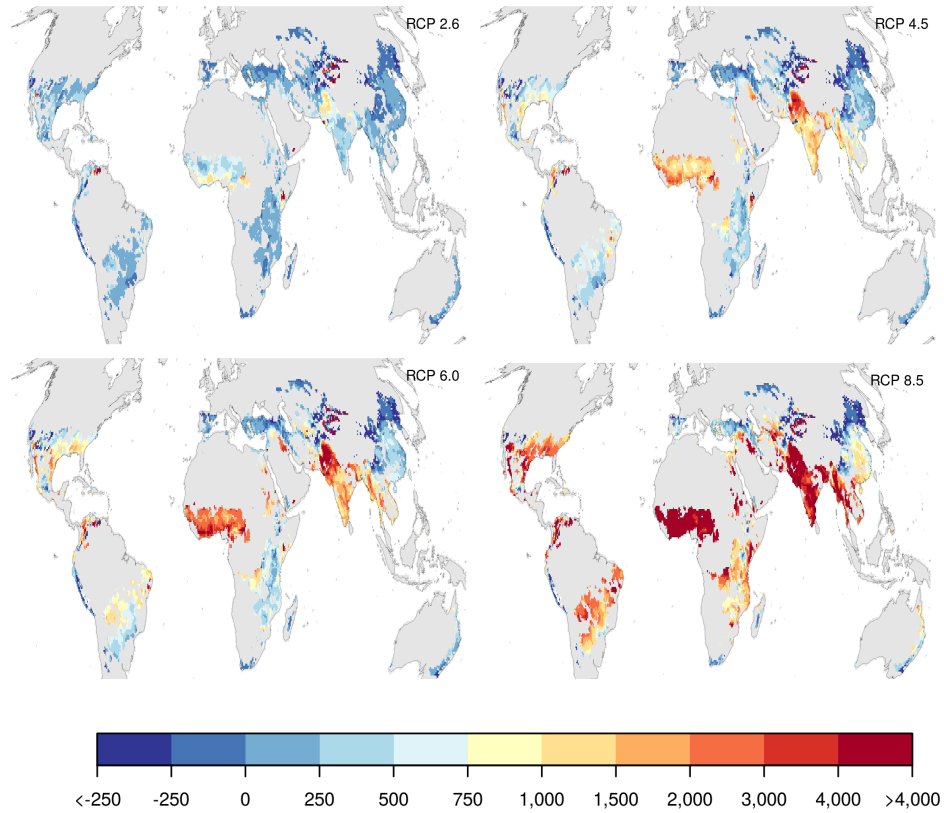

**Figure S16.** Simulated changes in virtual water content of seed cotton [ $\text{m}^3\text{t}^{-1}$ ] for different RCPs. Spatial pattern was kept constant to the year 2000 as provided by Portmann et al. (2010). Gray indicates areas currently not used for cotton production. Yields were averaged over 5 GCM patterns and over the period 2090-2099. After 2000, the  $[\text{CO}_2]$  was kept constant at the level of 2000 (368.87 ppm).

## References

- Chapagain, A. K., Hoekstra, A. Y., Savenije, H. H., and Gautam, R.: The water footprint of cotton consumption: An assessment of the impact of worldwide consumption of cotton products on the water resources in the cotton producing countries, *Ecological economics*, 60, 186–203, 2006.
- 20 FAO, R. et al.: FAOSTAT database, Food and Agriculture Organization of the United Nations, Rome, Italy, 1, 2018.
- ITC: Trade Map - List of exported products for the selected product (Cotton), [https://www.trademap.org/tradestat/Product\\_SelProduct\\_TS.aspx?nvpm=1%7c%7c%7c%7c%7c52%7c%7c%7c4%7c1%7c1%7c2%7c2%7c1%7c1%7c3%7c1](https://www.trademap.org/tradestat/Product_SelProduct_TS.aspx?nvpm=1%7c%7c%7c%7c%7c52%7c%7c%7c4%7c1%7c1%7c2%7c2%7c1%7c1%7c3%7c1), 2019.
- Kimball, B., Mauney, J., La Morte, R., Guinn, G., Nakayama, F., Radin, J., Lakatos, E., Michell, S., Parker, L., Peresta, G., Nixon III, P., Savoy, B., Harris, S., MacDonald, R., Pros, H., and Martinez, J.: Carbon Dioxide Enrichment: Data on the Response of Cotton to Varying
- 25 CO<sub>2</sub> Irrigation, and Nitrogen, Tech. rep., Oak Ridge National Laboratory, <https://doi.org/10.3334/CDIAC/vrc.ndp037>, 1992.
- Kimball, B. A.: Crop responses to elevated CO<sub>2</sub> and interactions with H<sub>2</sub>O, N, and temperature, *Current Opinion in Plant Biology*, 31, 36 – 43, <https://doi.org/https://doi.org/10.1016/j.pbi.2016.03.006>, 2016.
- Lewin, K. F., Hendrey, G. R., Nagy, J., and LaMorte, R. L.: Design and application of a free-air carbon dioxide enrichment facility, *Agricultural and Forest Meteorology*, 70, 15–29, 1994.
- 30 Mauney, J. R., Kimball, B. A., Pinter Jr, P. J., LaMorte, R. L., Lewin, K. F., Nagy, J., and Hendrey, G. R.: Growth and yield of cotton in response to a free-air carbon dioxide enrichment (FACE) environment, *Agricultural and Forest Meteorology*, 70, 49–67, 1994.
- Nagy, J., Lewin, K. F., Hendrey, G. R., Hassinger, E., and LaMorte, R.: FACE facility CO<sub>2</sub> concentration control and CO<sub>2</sub> use in 1990 and 1991, *Agricultural and Forest Meteorology*, 70, 31–48, 1994.
- Portmann, F. T., Siebert, S., and Döll, P.: MIRCA2000—Global monthly irrigated and rainfed crop areas around the year 2000: A new
- 35 high-resolution data set for agricultural and hydrological modeling, *Global Biogeochemical Cycles*, 24, 2010.
- Sheth, K.: Top Cotton Producing Countries In The World, <https://www.worldatlas.com/articles/top-cotton-producing-countries-in-the-world.html>, 2017.
